# Supplementary material for: Enhanced cycling performance of the Li4Ti5O12anode in an ethers electrolyte induced by a solid–electrolyte interphase film
Source: Royal Society of Chemistry journal article supplement (doi:10.1039/c5ra06566f), 2015-01-01
Supplement: c5ra06566f1.pdf [file c5ra06566f1.pdf]

## Supporting Information

**Table S1** The fitting results of the EIS tests in carbonate and ether electrolytes (Fig. 2c and 2d)

| Electrolytes | $R_s$ | $R_{ct}$ |
|--------------|-------|----------|
| carbonate    | 7.56  | 421.85   |
| ether        | 2.583 | 64.11    |

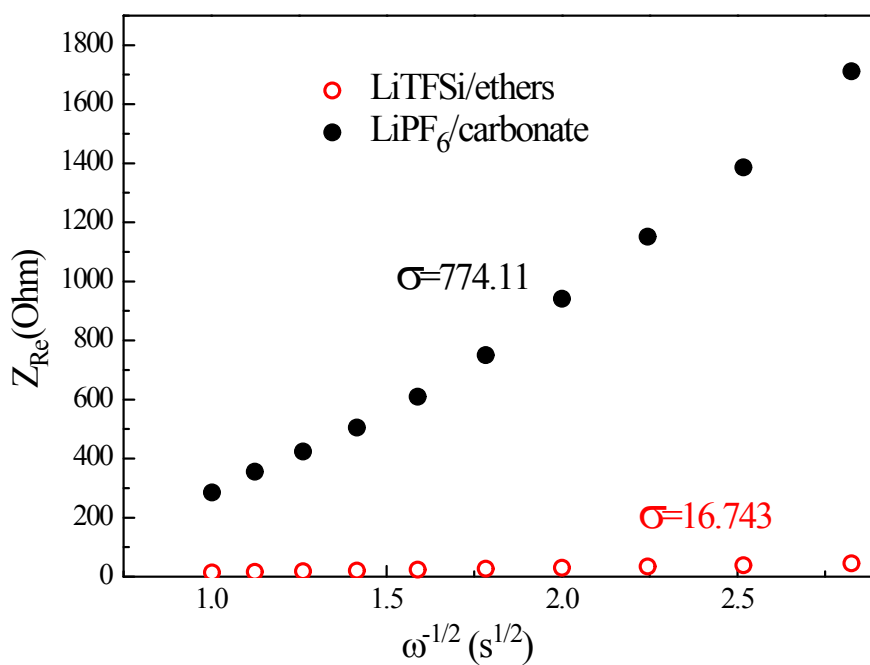

**Fig. S1**  $Z_{Re}$  vs  $\omega^{-1/2}$  plots in the low frequency region obtained from EIS measurements.

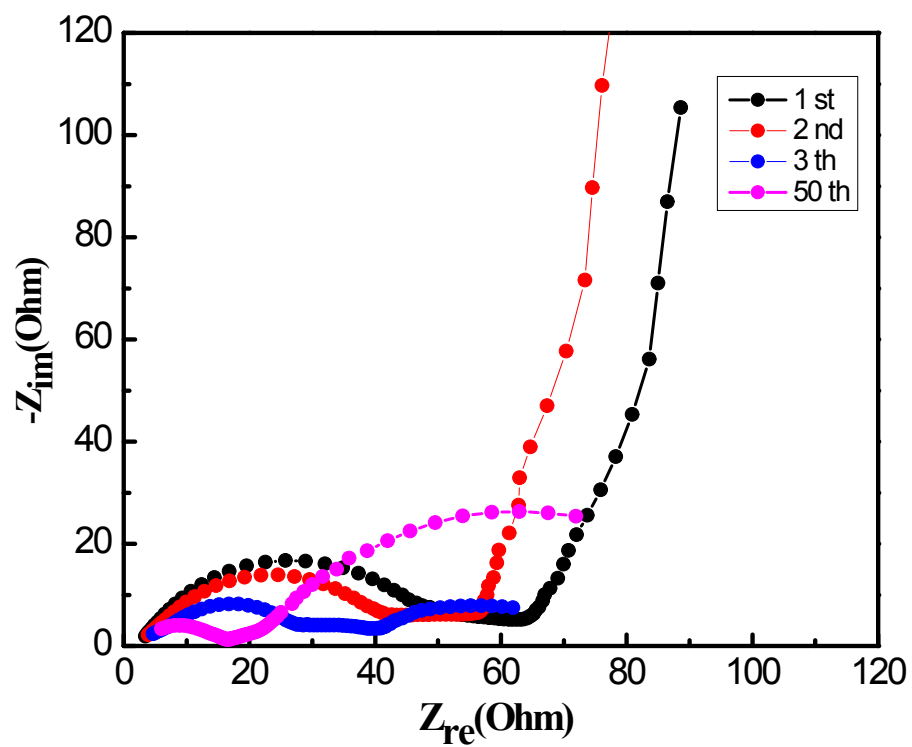

**Fig. S2** Nyquist plots of  $\text{Li}_4\text{Ti}_5\text{O}_{12}$  anodes in  $\text{LiTFSi/ethers}$  electrolyte after different cycles at the rate of 2C.
